# Supplementary material for: Single-cell mass spectrometry imaging of lipids in HeLa cells via tapping-mode scanning probe electrospray ionization
Source: Springer Nature journal article supplement (doi:10.1038/s42004-025-01521-2), 2025-05-14
Supplement: MOESM1 [file 42004_2025_1521_MOESM1_ESM.pdf]

## **Supplementary Information**

### **Single-Cell Mass Spectrometry Imaging of Lipids in HeLa Cells via Tapping-Mode Scanning Probe Electrospray Ionization**

Yoichi Otsuka<sup>\*1,2,3</sup>, Kazuya Kabayama<sup>2,3,4</sup>, Ayane Miura<sup>2</sup>, Masatomo Takahashi<sup>5</sup>, Kosuke Hata<sup>5</sup>, Yoshihiro Izumi<sup>5</sup>, Takeshi Bamba<sup>5</sup>, Koichi Fukase<sup>2,3,4</sup>, Michisato Toyoda<sup>1,2,3</sup>

<sup>1</sup>Department of Physics, Graduate School of Science, The University of Osaka, Toyonaka, Osaka, Japan

<sup>2</sup>Department of Chemistry, Graduate School of Science, The University of Osaka, Toyonaka, Osaka, Japan

<sup>3</sup>Forefront Research Center, Graduate School of Science, The University of Osaka, Toyonaka, Osaka, Japan

<sup>4</sup>Interdisciplinary Research Center for Radiation Sciences, Institute for Radiation Sciences, The University of Osaka, Toyonaka, Osaka, Japan

<sup>5</sup>Division of Metabolomics, Medical Research Center for High Depth Omics, Medical Institute of Bioregulation, Kyushu University, Fukuoka, Fukuoka, Japan

#### **\*Corresponding author**

Yoichi Otsuka

Email: [otsuka@phys.sci.osaka-u.ac.jp](mailto:otsuka@phys.sci.osaka-u.ac.jp)

Telephone: +81-6-6850-5748

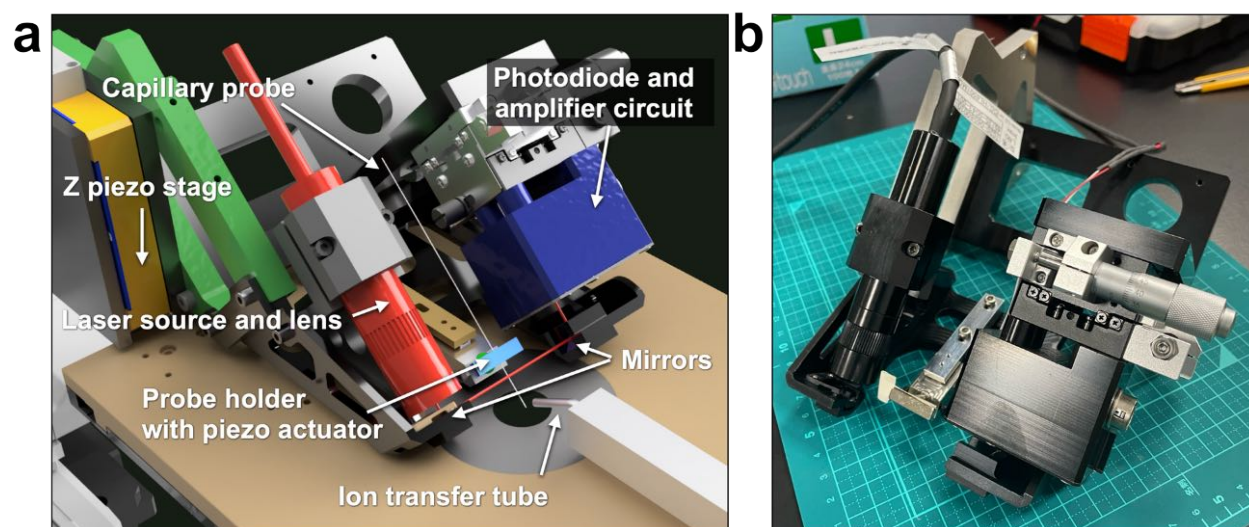

**Supplementary Fig. 1.** Overview of the new t-SPESI unit for use with an inverted fluorescence microscope.

(a) Rendered image of a 3D model, showing the name of each component of the t-SPESI unit indicated by arrows. Each component is color coded for identification. (b) Photograph of the t-SPESI unit.

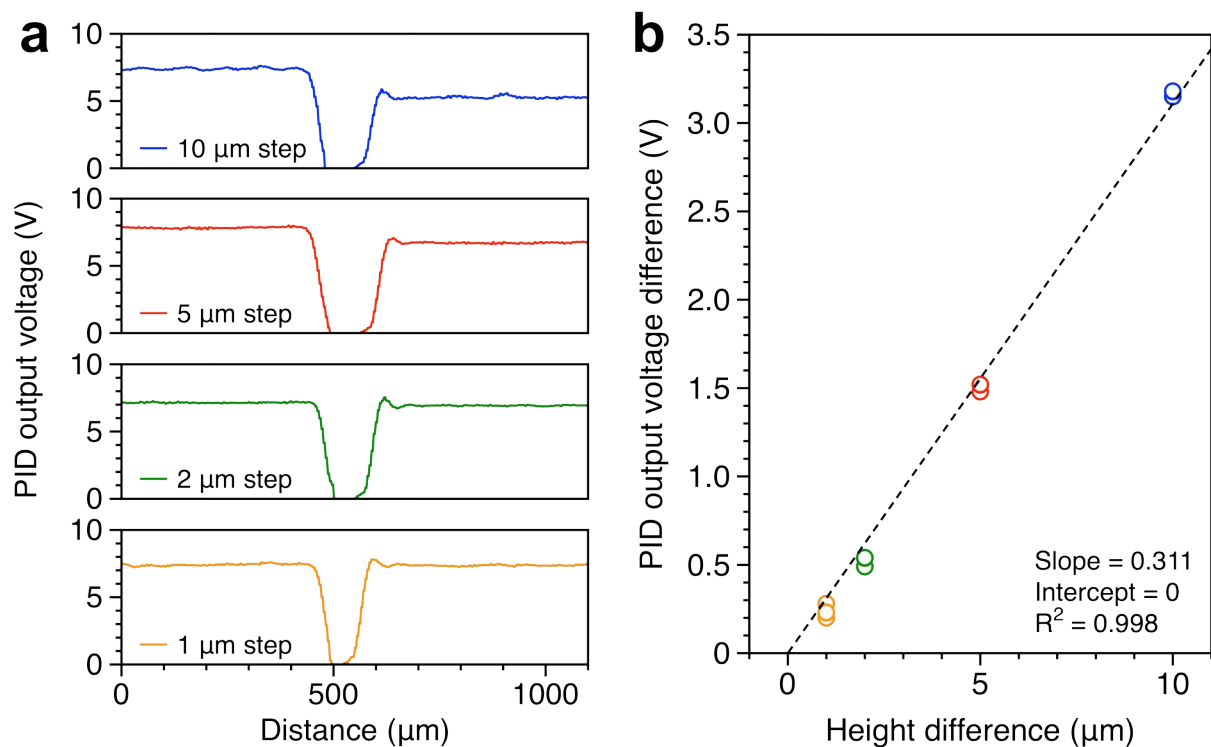

**Supplementary Fig. 2.** Relationship between the sample height and feedback controller output.

(a) Section profiles showing the relationship between the output signal from the feedback control circuit (PID output voltage) and the probe position when the probe scans between samples of different heights. (b) Relationship between the height difference of the samples and the PID output voltage difference. The linear fit result is shown as a dashed line. The inset shows the slope and  $R^2$  value of the dashed line. It was confirmed that the calibration data could be linearly fitted. In addition, the position resolution of the piezo stage for controlling the height of the probe was 1 nm, and the repeat positioning accuracy was  $\pm 1$  nm; therefore, the height of the sample in the range of up to 10  $\mu\text{m}$  could be evaluated with nanoscale accuracy.

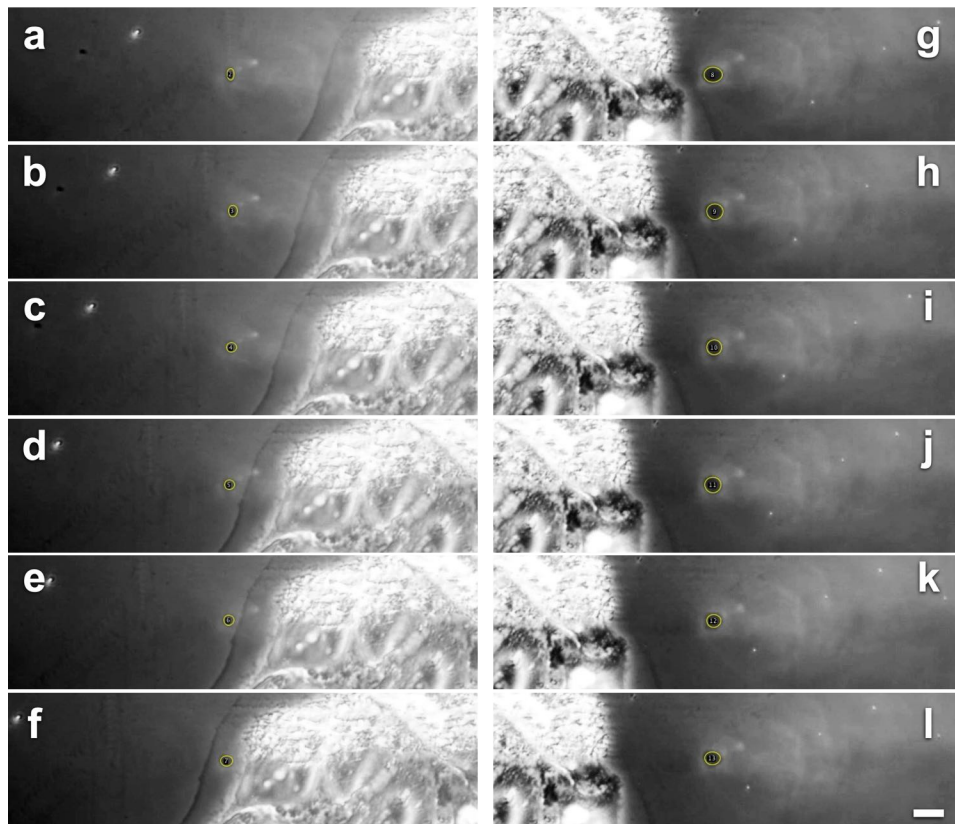

**Supplementary Fig. 3.** Evaluation of spreading of the liquid bridge on the glass substrate during a single-line scan of the probe.

(a) and (l) correspond to the snapshots at the beginning and end of the probe scan, respectively, and the others are snapshots taken during the scan, arranged in order of increasing time. The area of the liquid bridge is indicated by the yellow circles. Scale bar: 10  $\mu\text{m}$ .



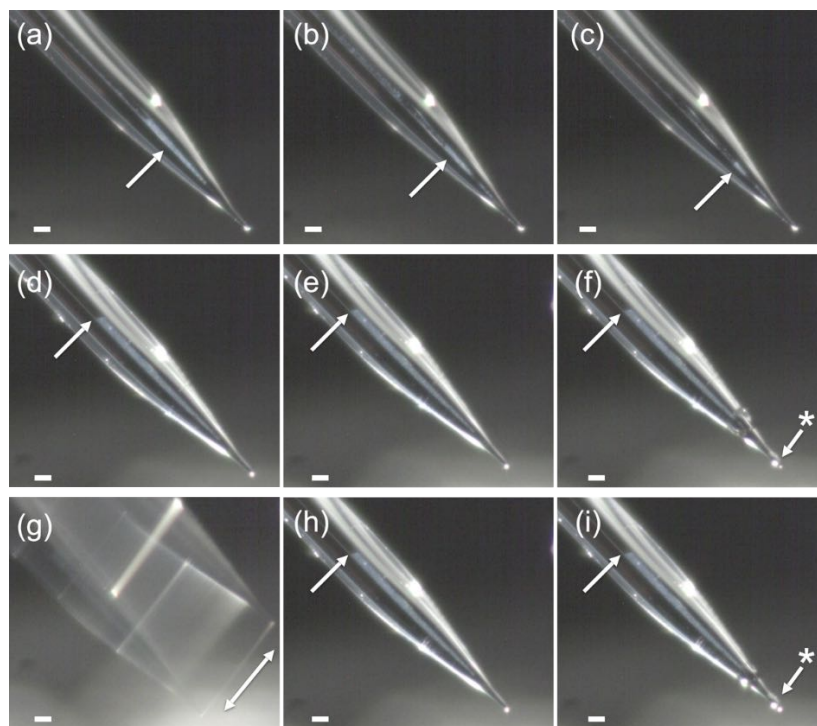

**Supplementary Fig. 4.** Comparison of the movements of octadecylsilyl-group-modified and amino-group-modified particles in a capillary probe.

**(a-c)** Observation results when +4 kV was applied to the solvent using a probe filled with octadecylsilyl-group-modified particles (O-particles). **(a)**, **(b)**, and **(c)** Images before applying the voltage, 45 s after applying the voltage, and 100 s after applying the voltage. During voltage application, the particles moved upward with time, and the number of particles at the tip of the probe (arrows in **(a)**, **(b)**, and **(c)**) decreased.

**(d-f)** Observation results when +4 kV was applied to the solvent using a probe filled with amino-group-modified particles (N-particles). **(d)** and **(e)** Images immediately after and 150 s after voltage application, respectively. The particles in the probe (arrows in **(d)** and **(e)**) did not move with time and remained at the same position. In addition, when the voltage was set to 0 V, the particles in the probe did not move with time and remained at the same position (arrows in **(f)**). The solvent was confirmed to flow out of the tip of the probe (asterisk in **(f)**).

Next, with a voltage of +4 kV applied to the solvent, the probe was oscillated in the vertical direction for 110 s at a resonant frequency of 523 Hz. The arrows in **(g)** indicate the oscillation direction. When the oscillation stopped, the particles in the probe were observed to be present at the same position (arrows in **(h)**). Furthermore, even when the voltage was set to 0 V, the particles in the probe did not move with time and remained at the same position (arrow in **(i)**). In addition, the solvent flowed out of the tip of the probe (asterisk in **(i)**). Scale bar: 100  $\mu$ m.

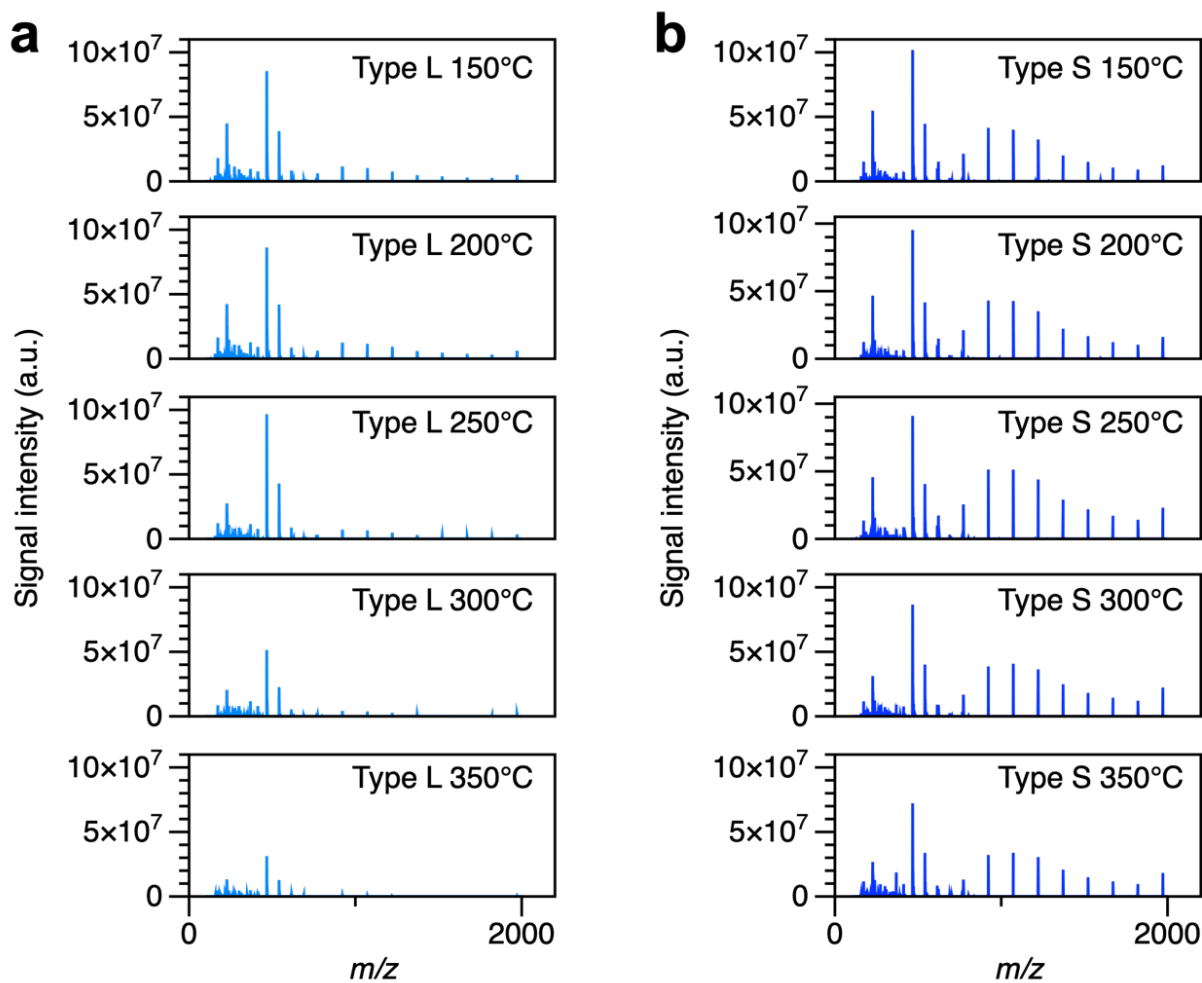

**Supplementary Fig. 5.** Comparison of mass spectra of NaI cluster ions obtained with different ion transfer tubes

(a) and (b) Mass spectra of the NaI cluster ions generated by ESI using different ion transfer tubes (types L and S, respectively). The temperature of the ion transfer tube was varied in the range of 150–350°C.

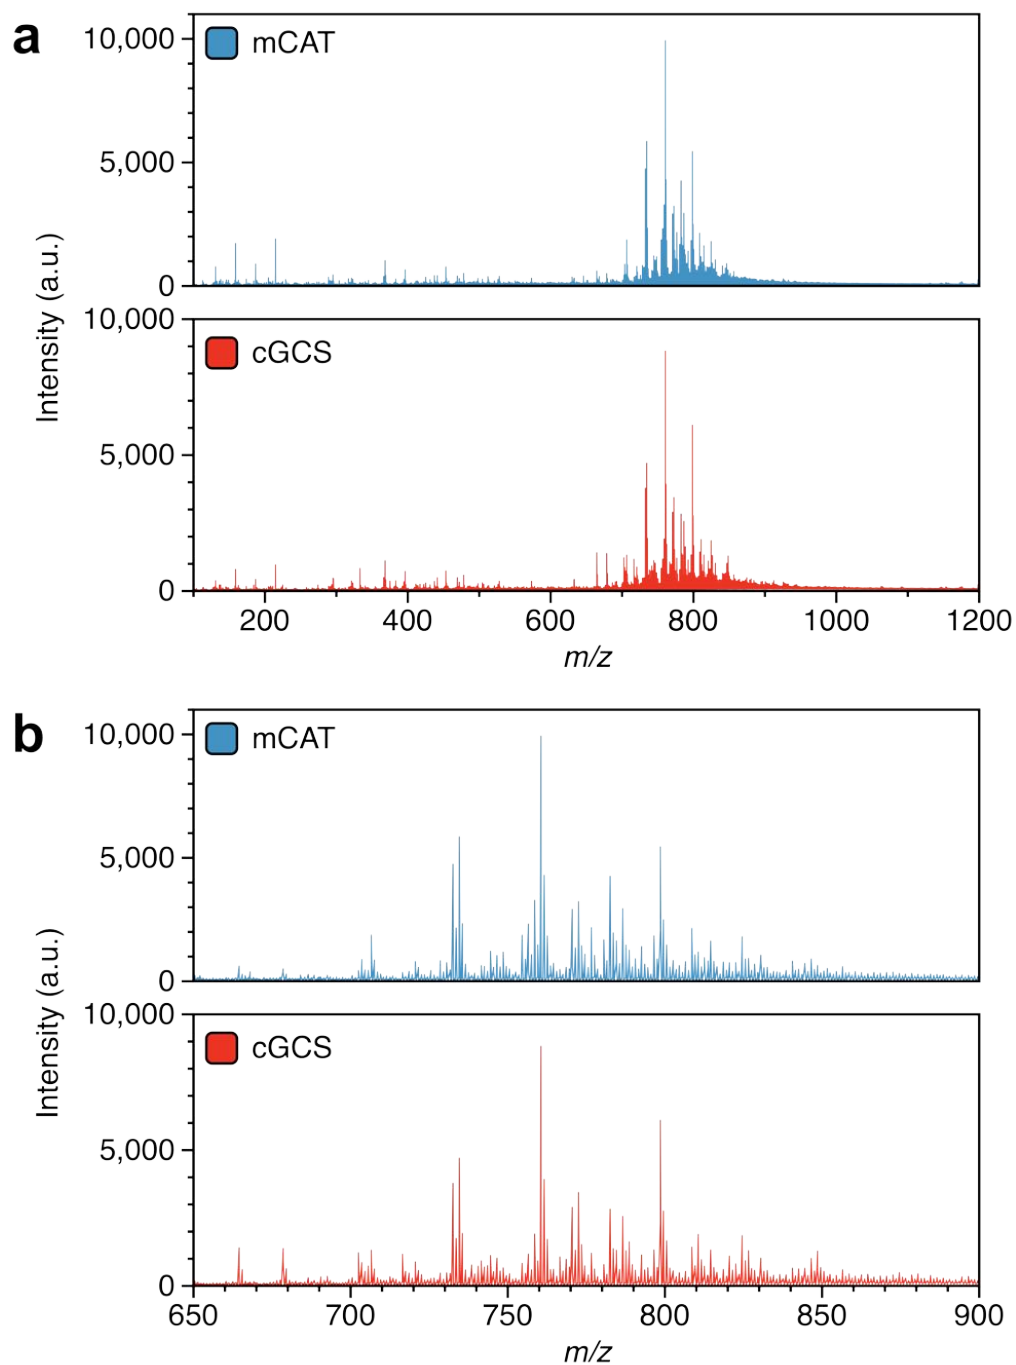

**Supplementary Fig. 6.** Mass spectra of HeLa cells.

Average mass spectra of mCAT and cGCS cells. **(a)** Mass spectra in the range of  $m/z$  100–1200, and **(b)** enlarged mass spectra in the range of  $m/z$  650–900.

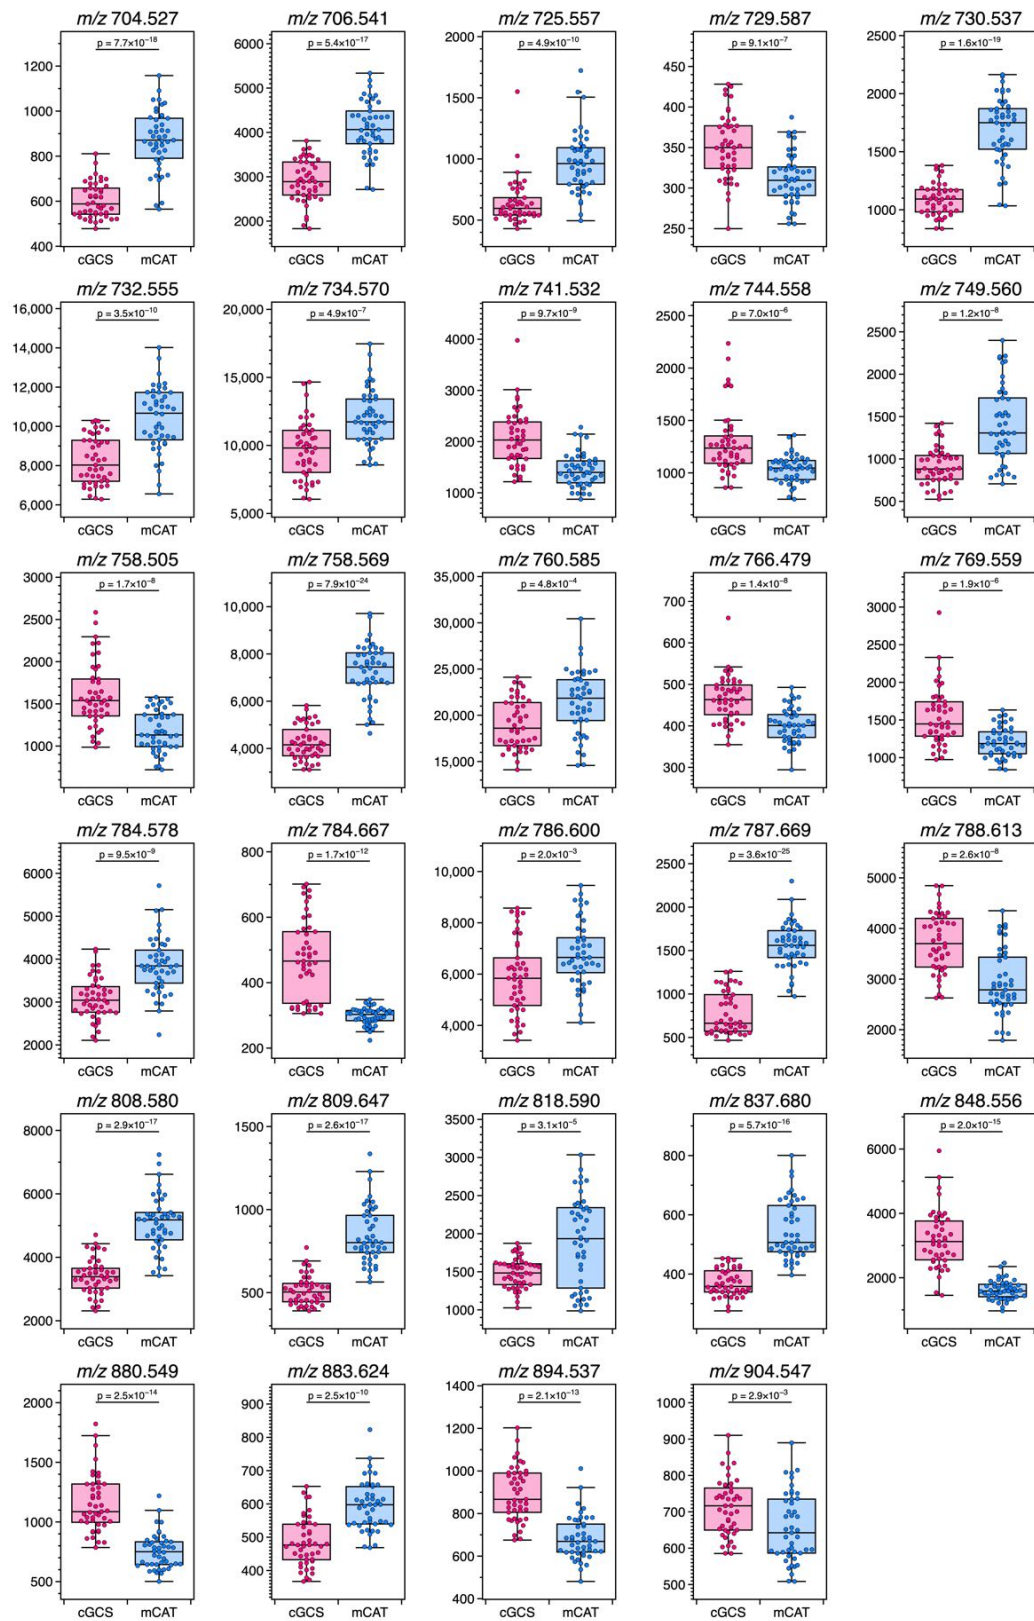

**Supplementary Fig. 7.** Comparison of lipid ion signal intensities between cell types.



mCAT: Region 1

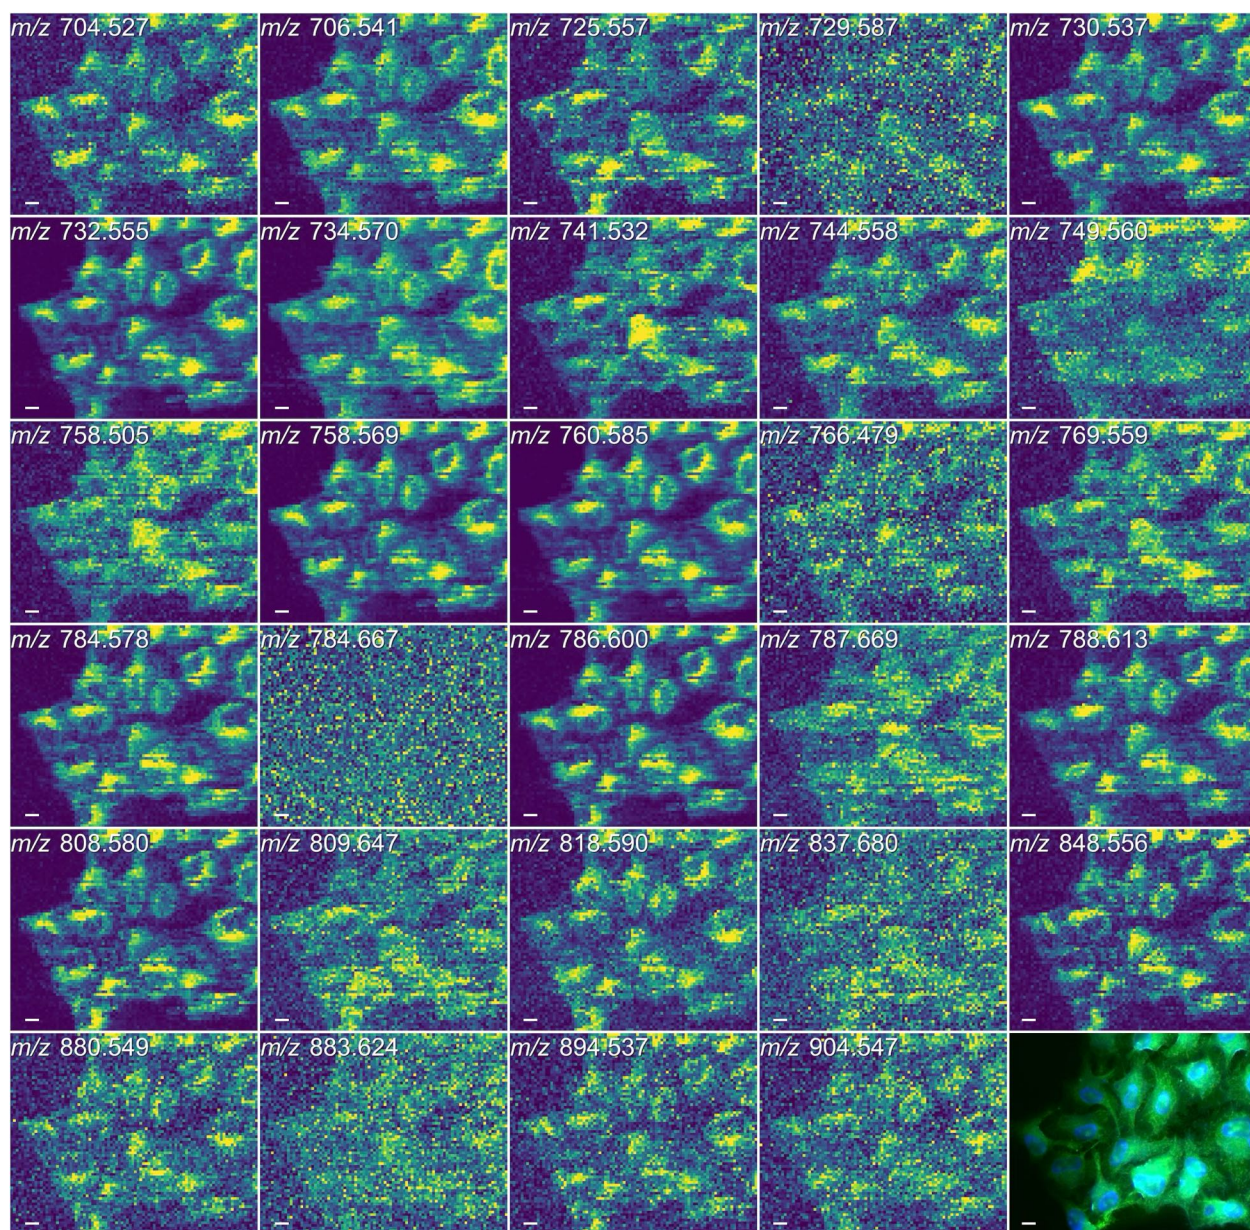



mCAT: Region 2

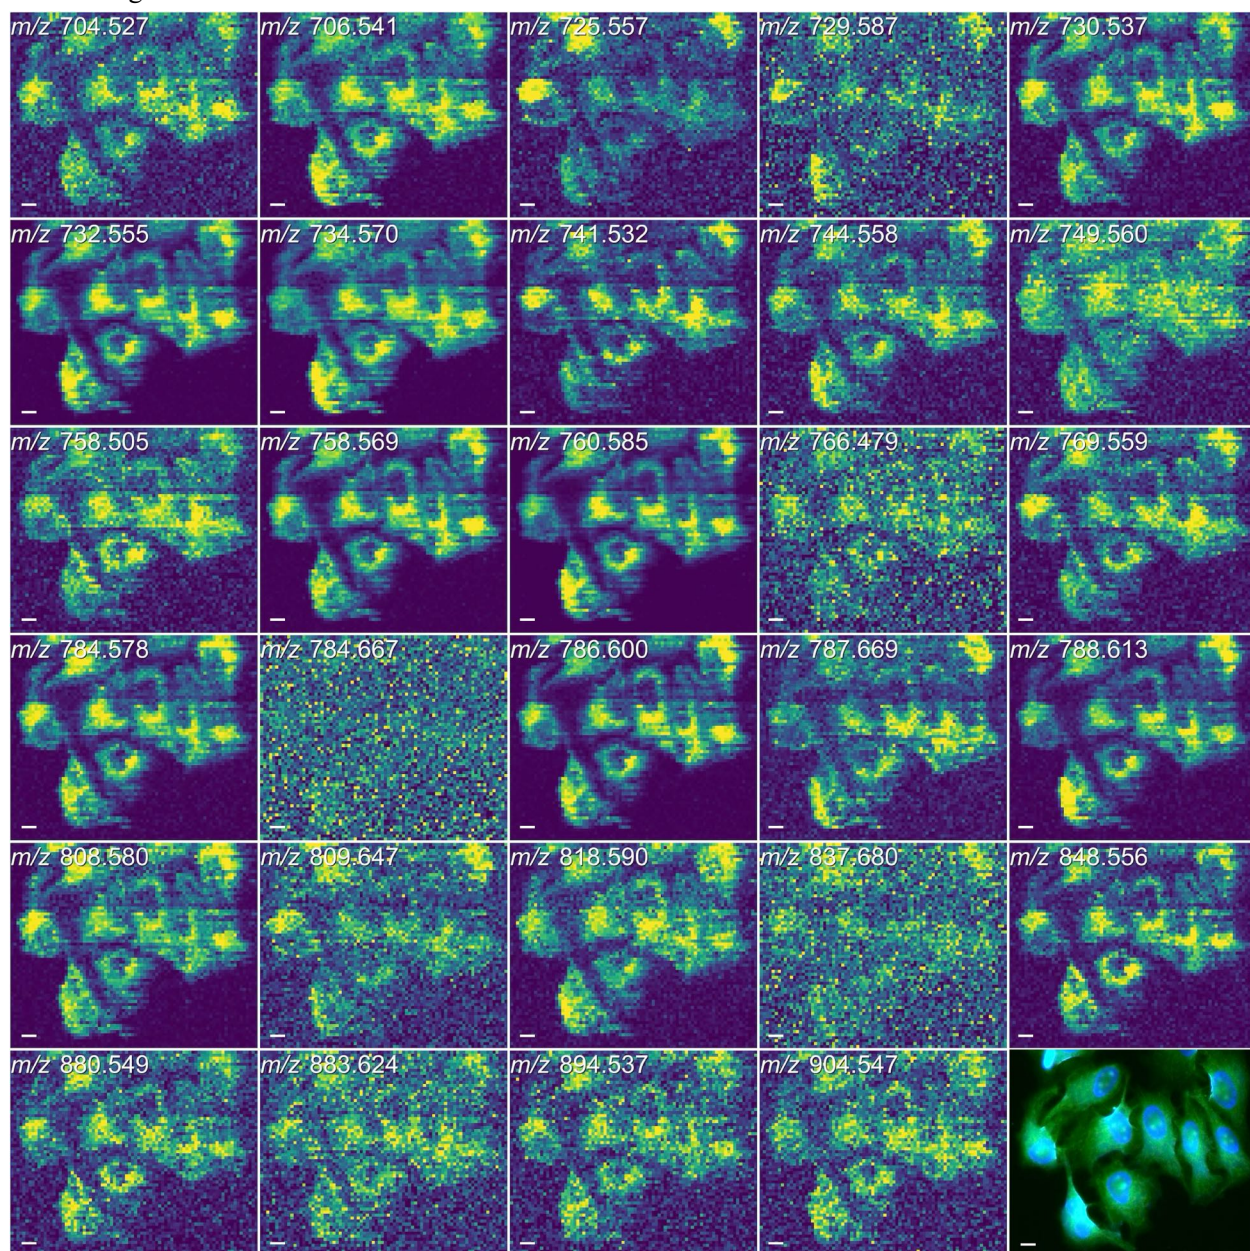



mCAT: Region 3

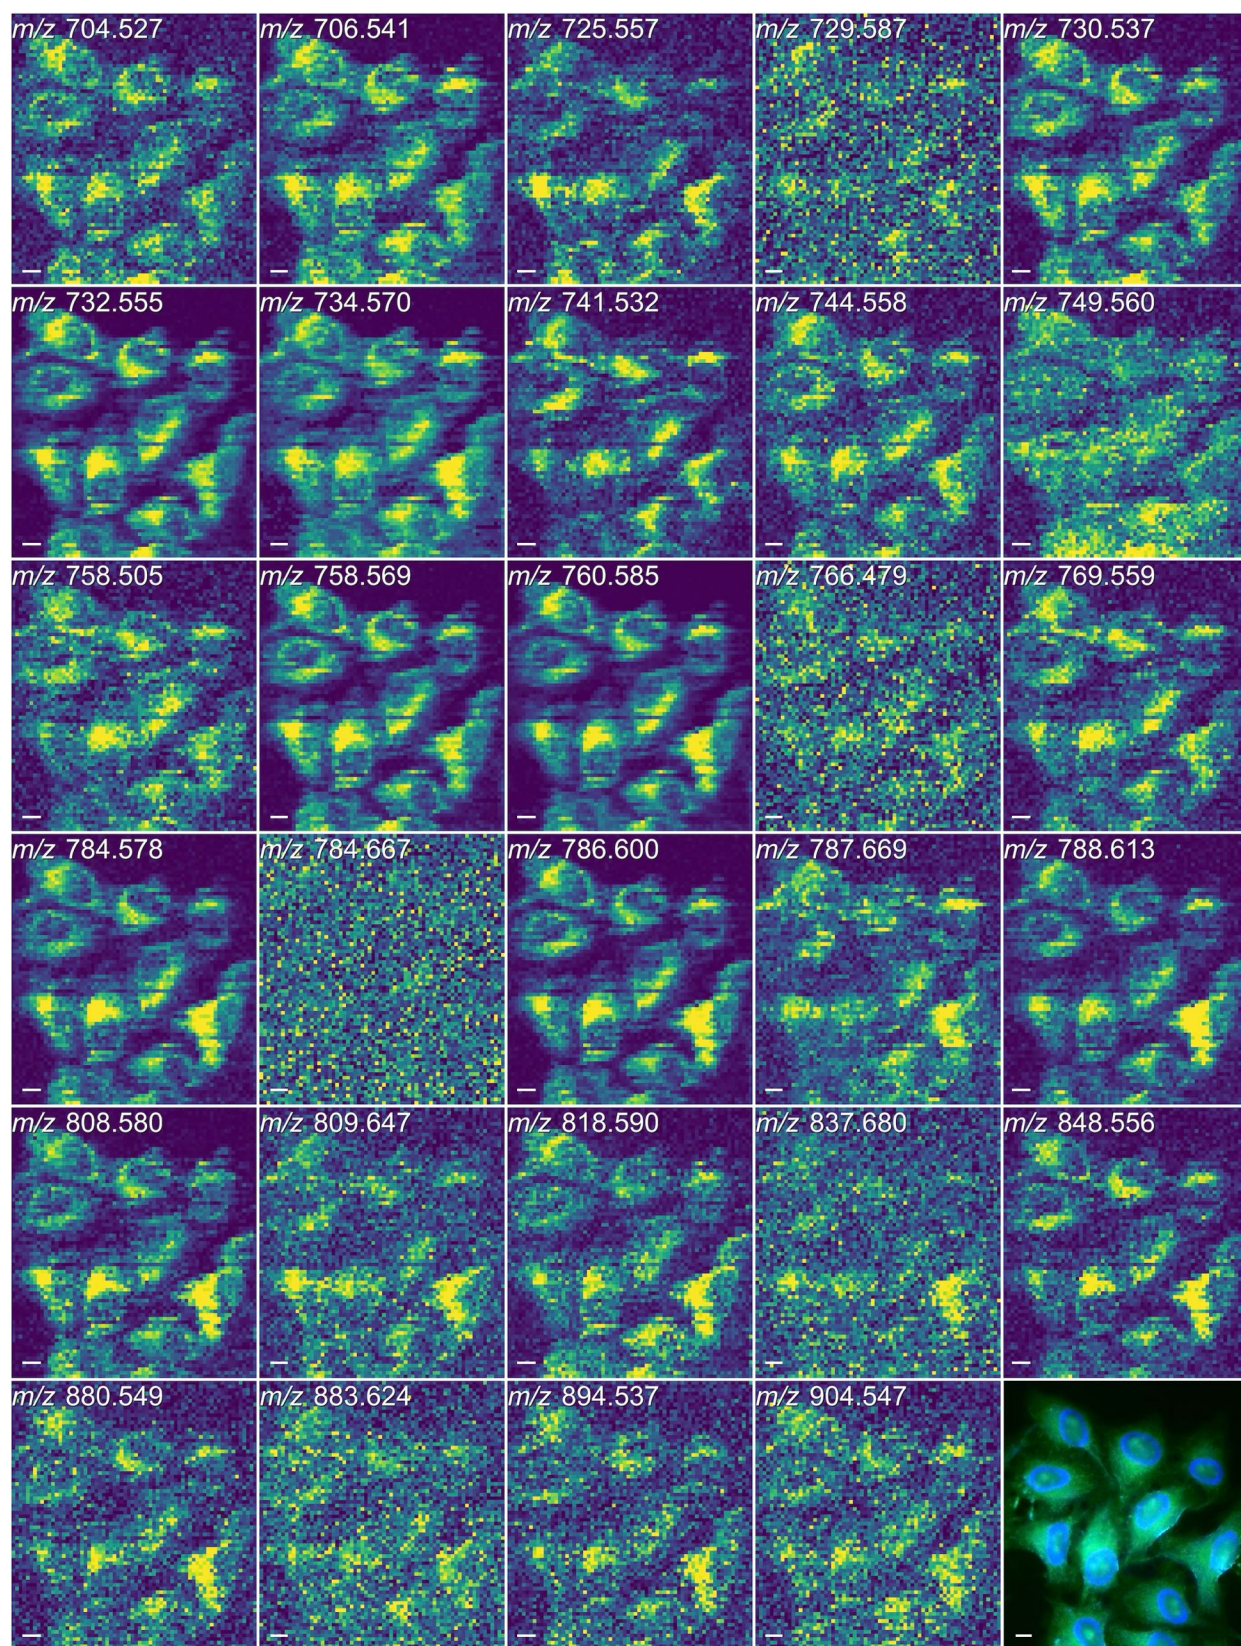



mCAT: Region 4

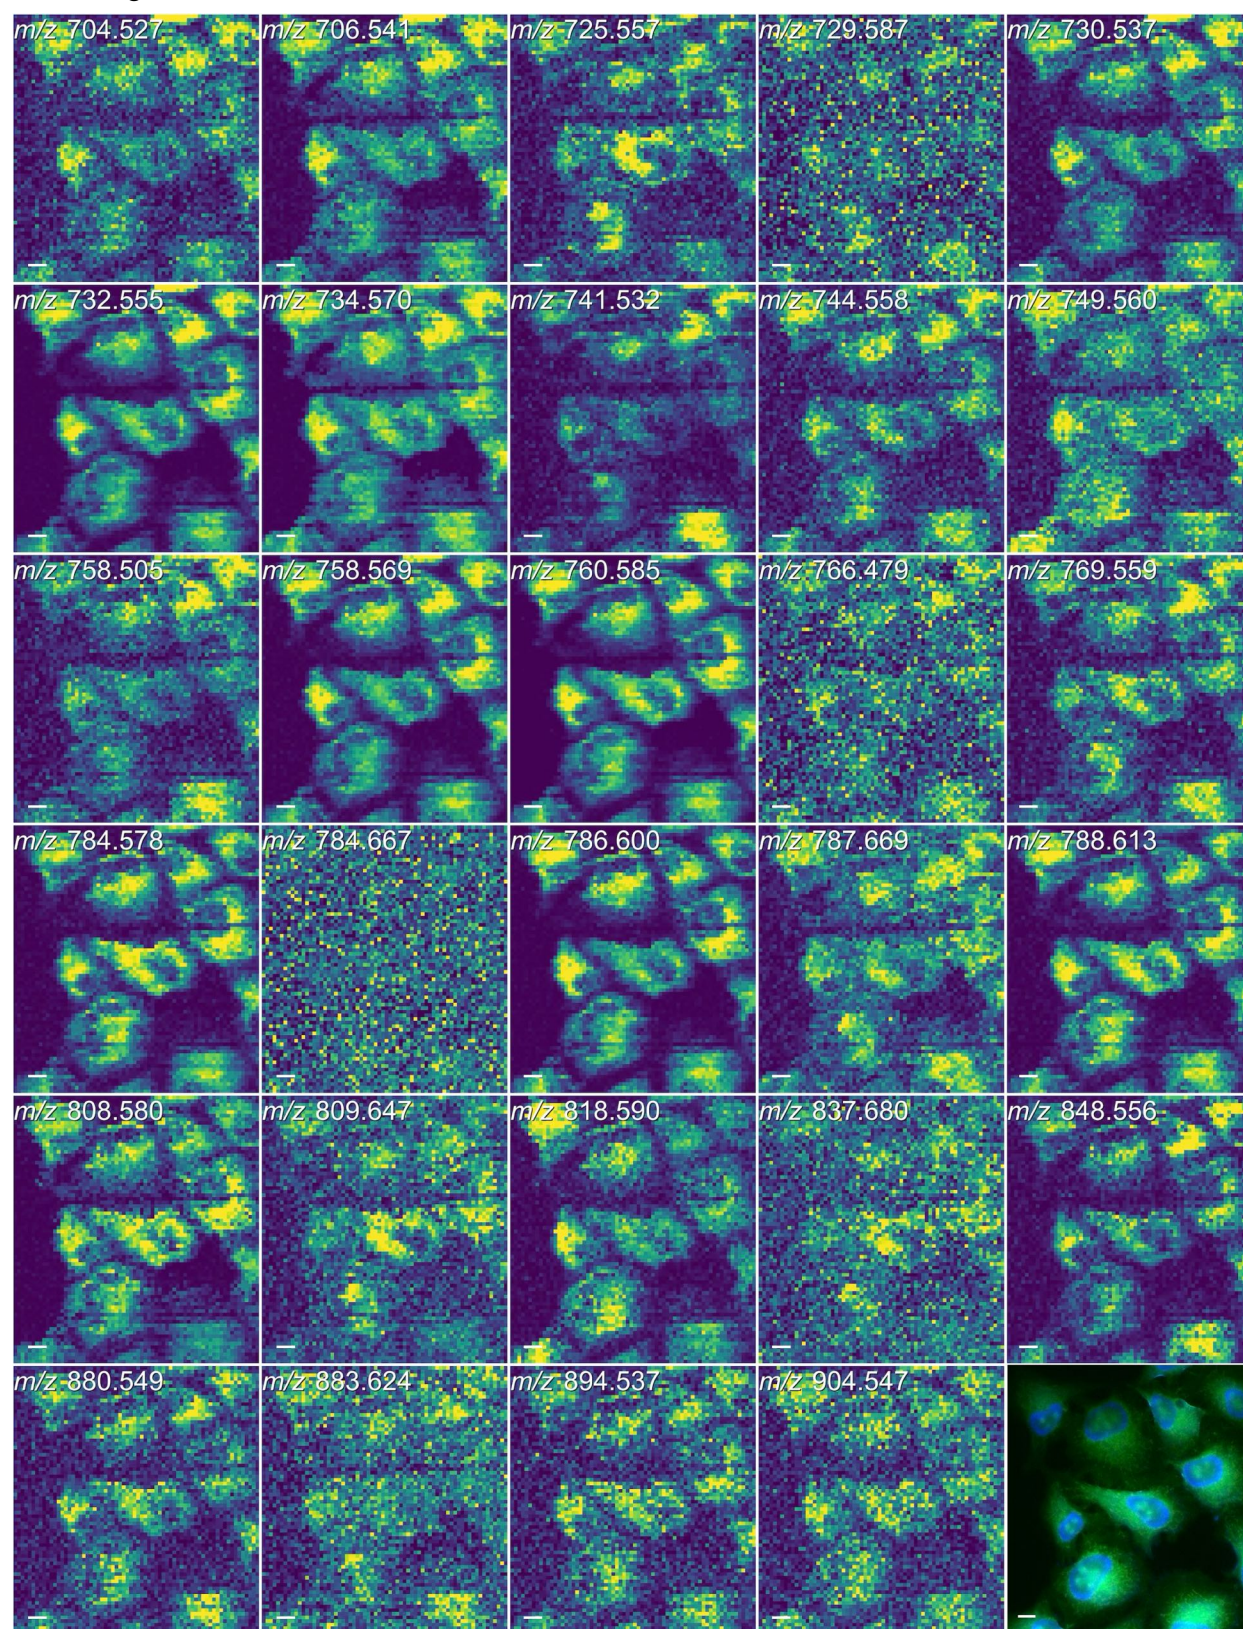



mCAT: Region 5

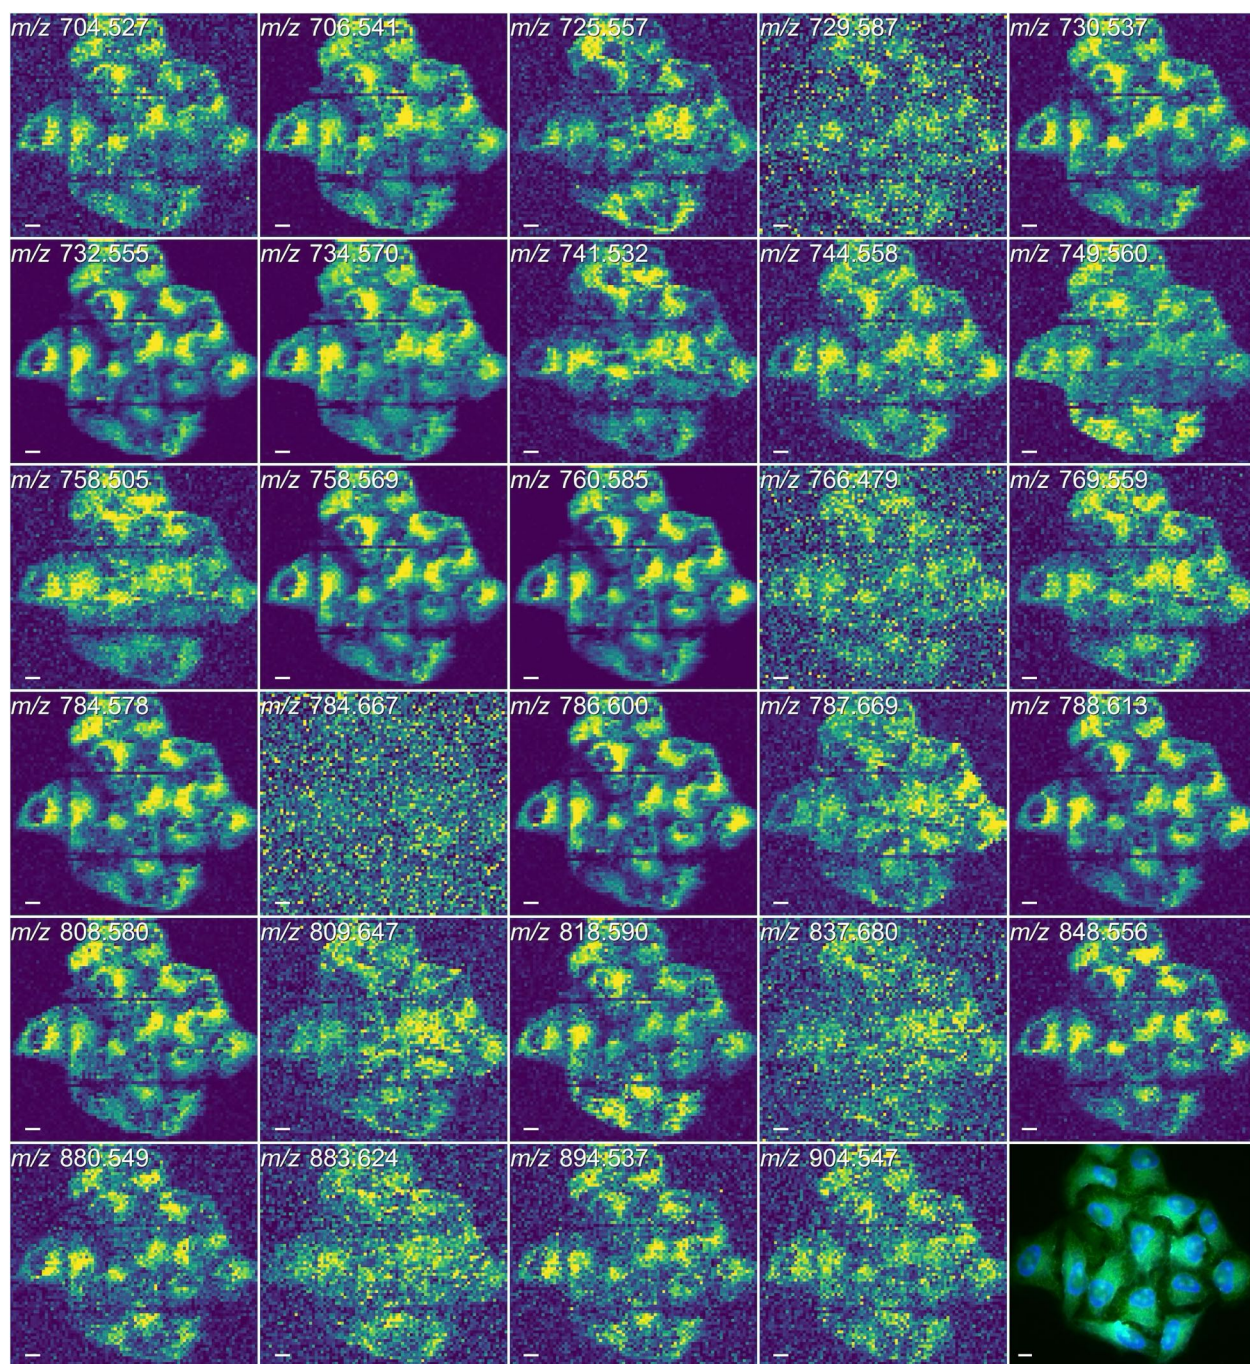



cGCS: Region 1

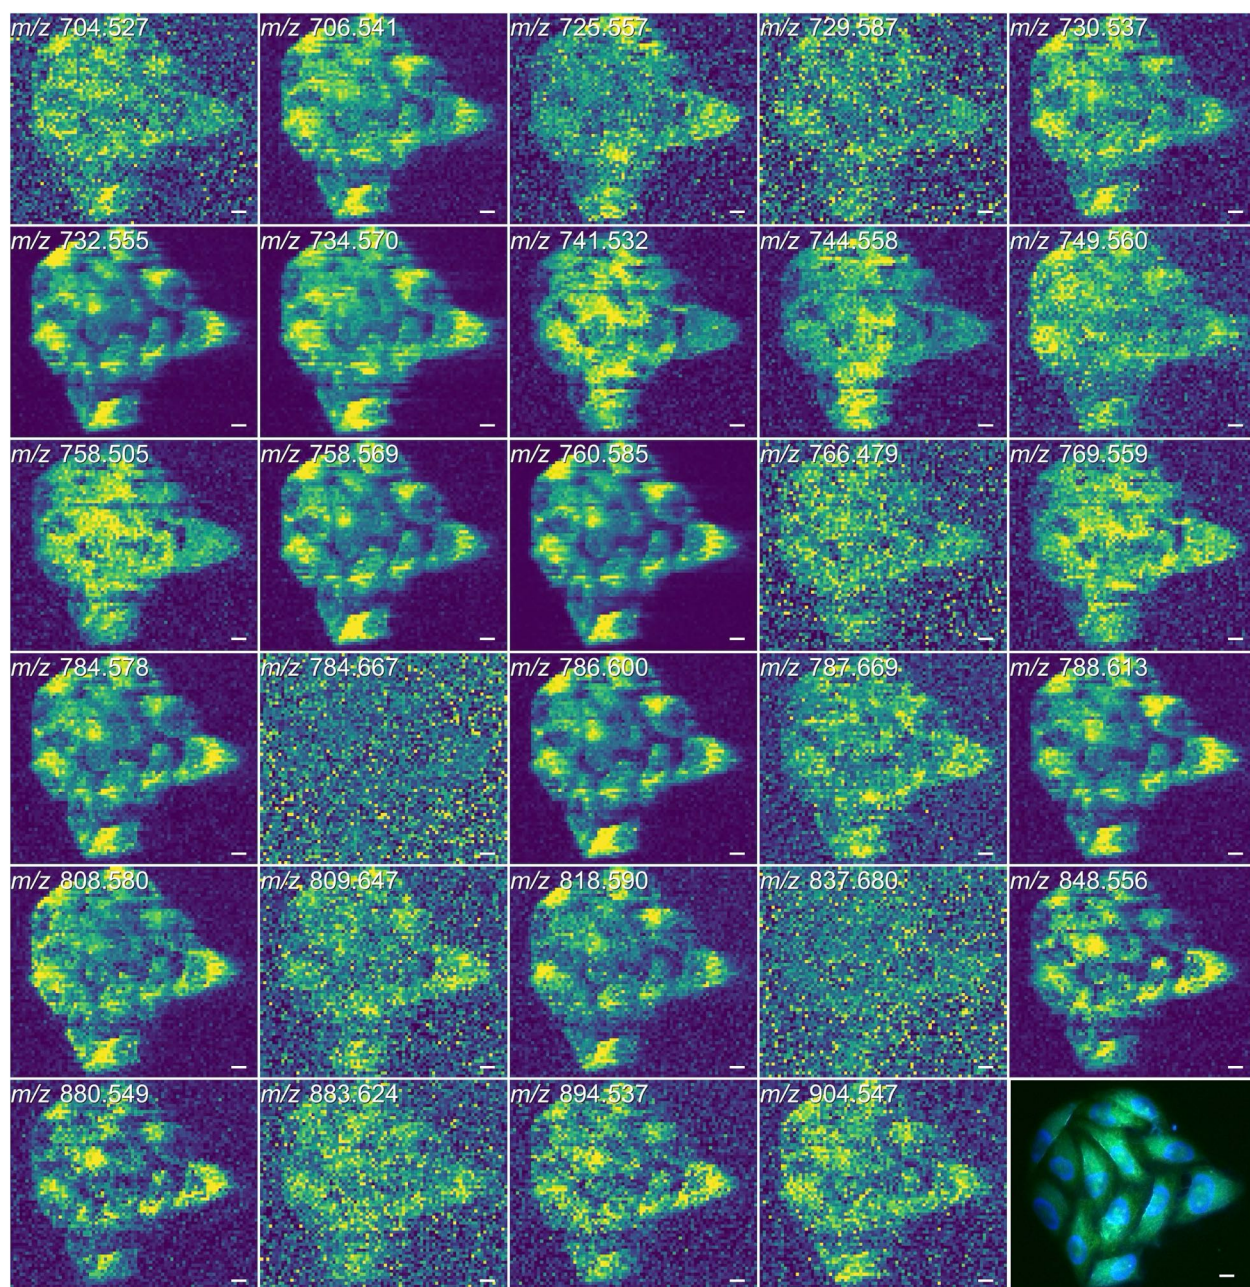



cGCS: Region 2

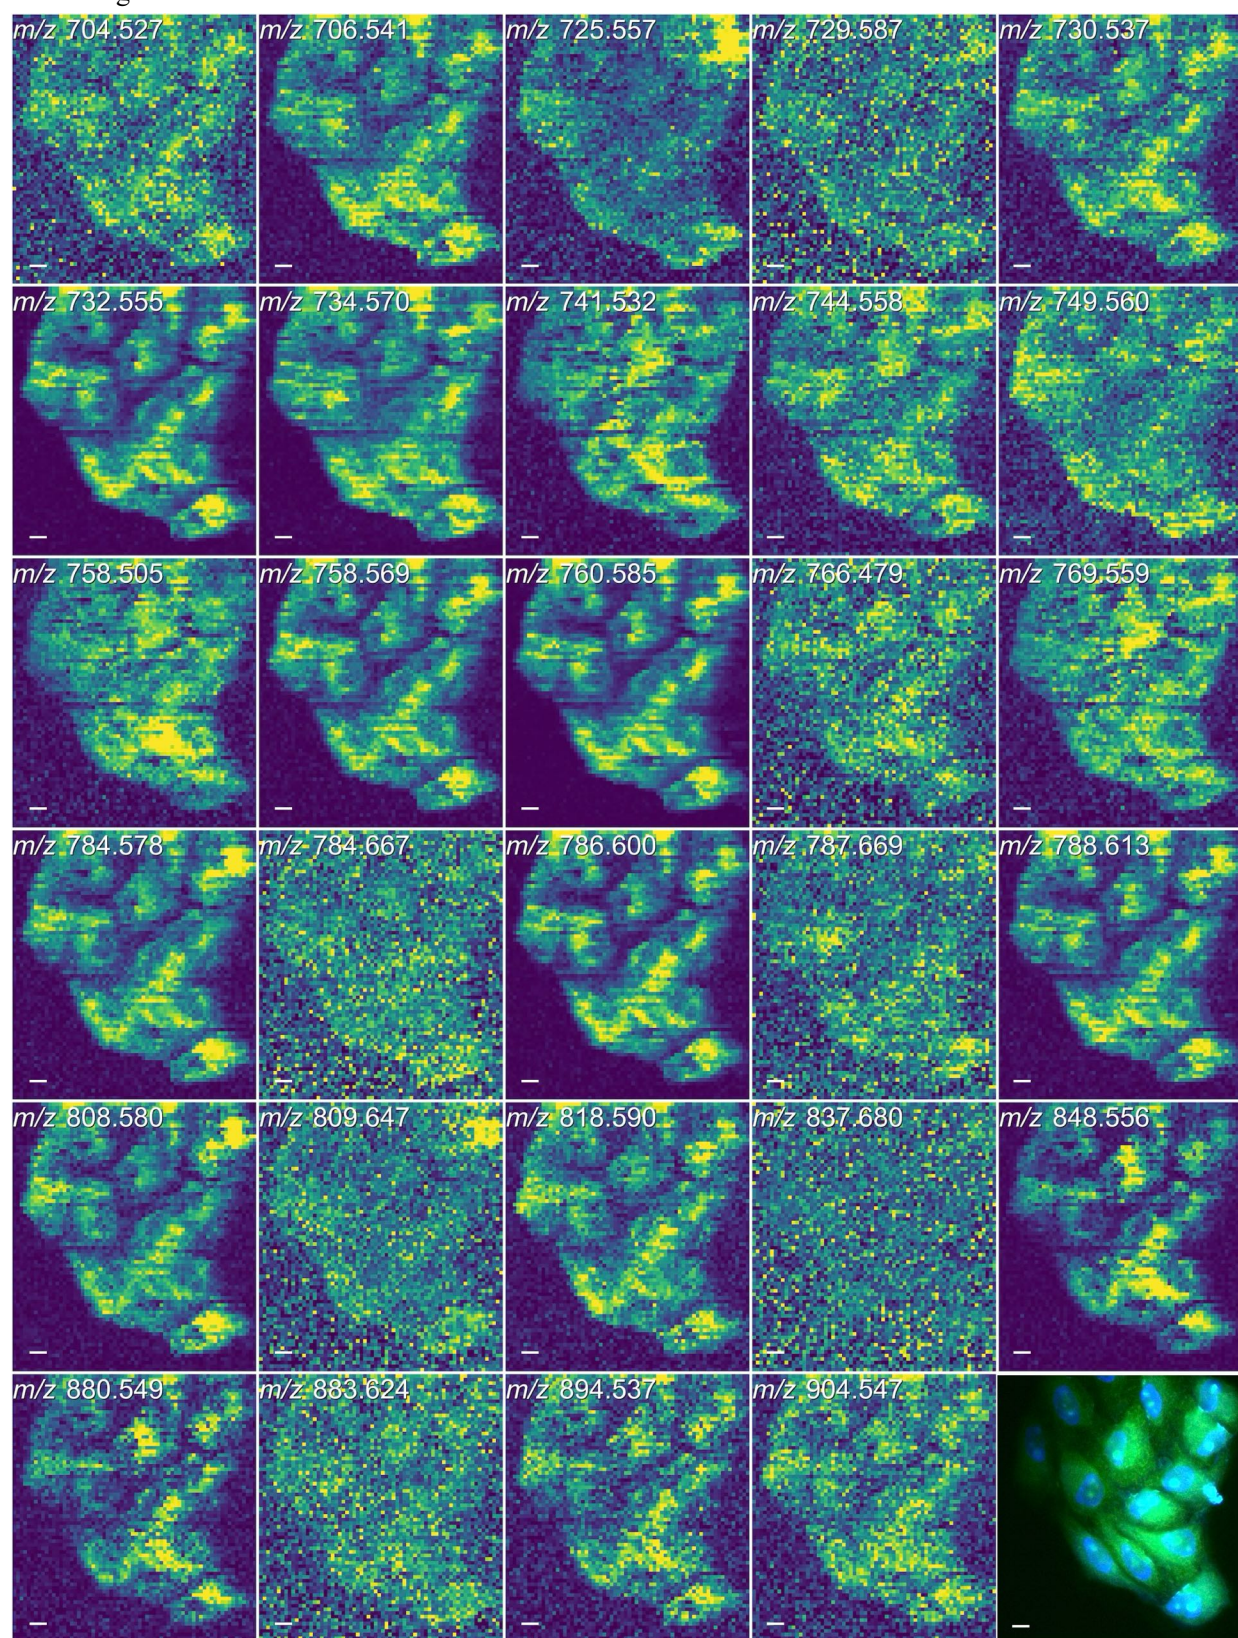



cGCS: Region 3

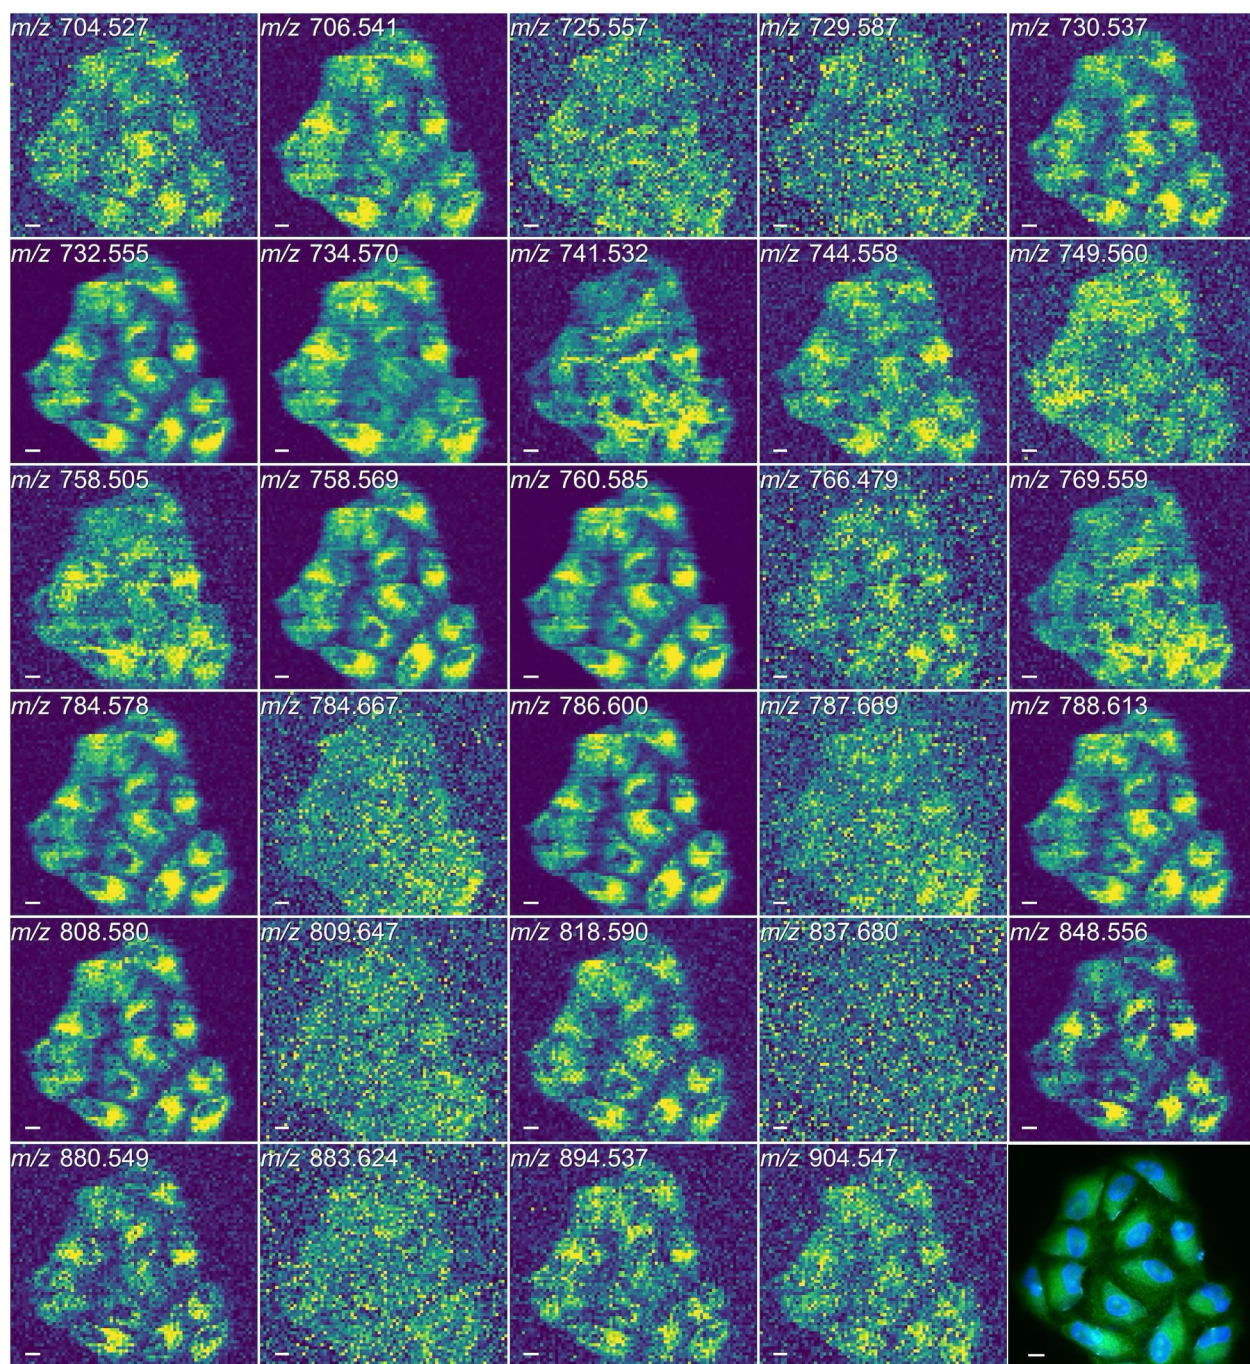



cGCS: Region 4

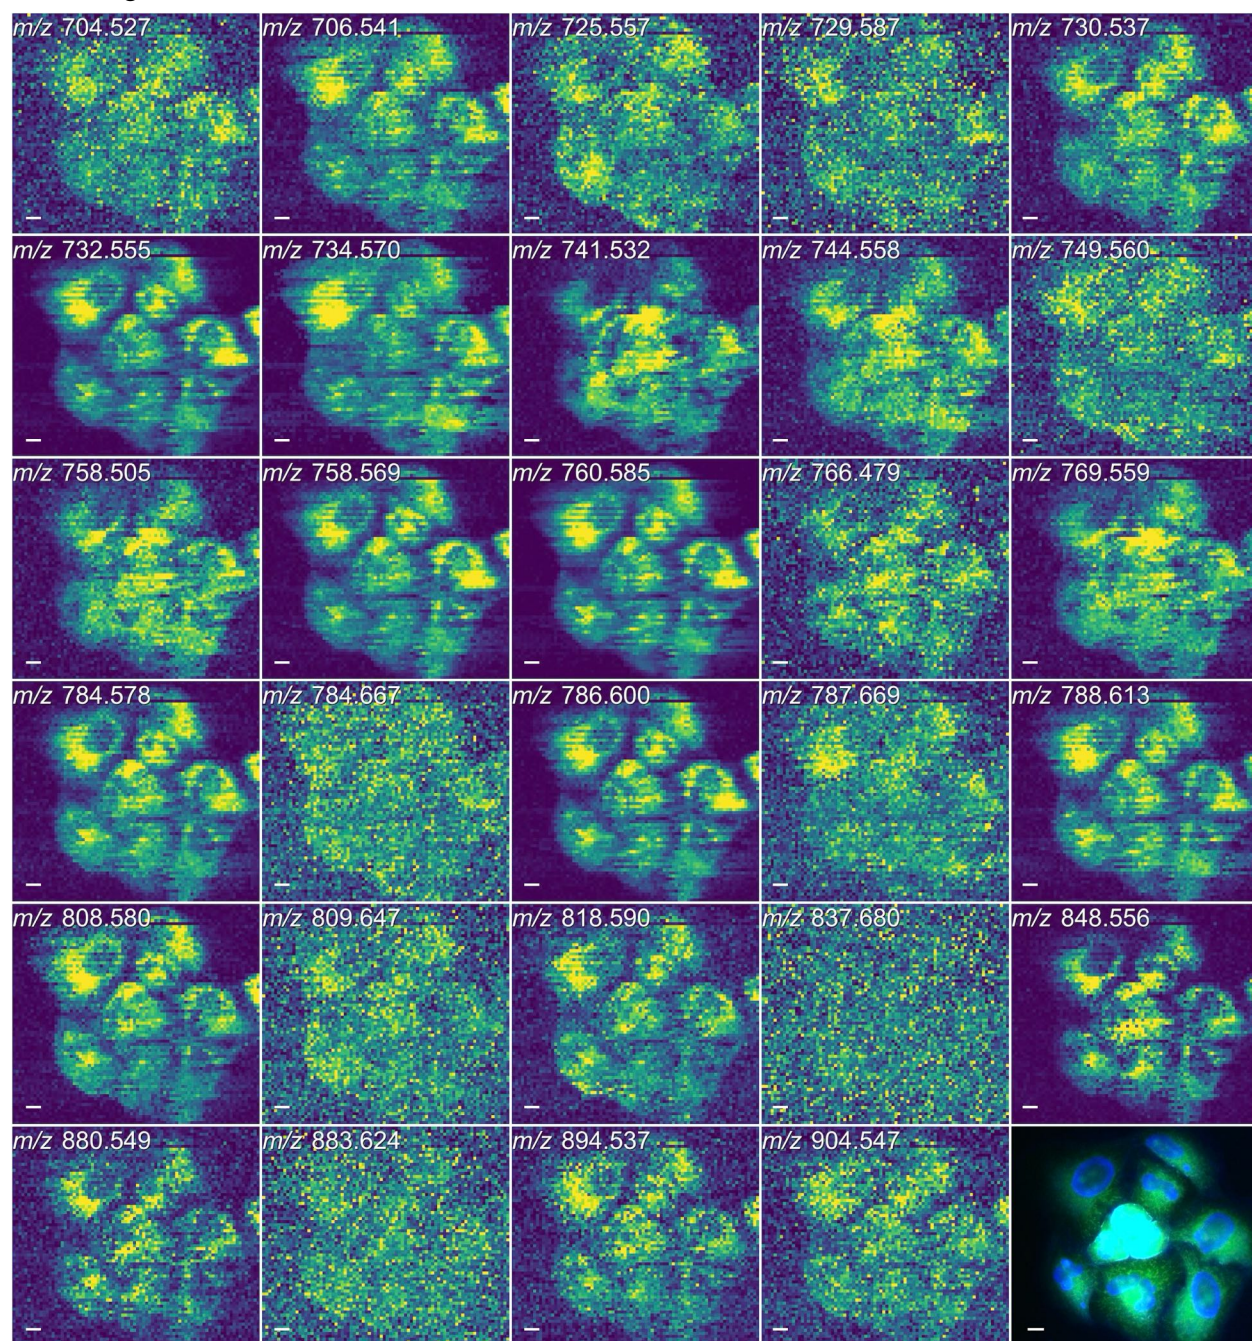

**Supplementary Fig. 8.** Ion images of HeLa cells obtained by t-SPESI-MSI. Scale bar: 10  $\mu\text{m}$ .

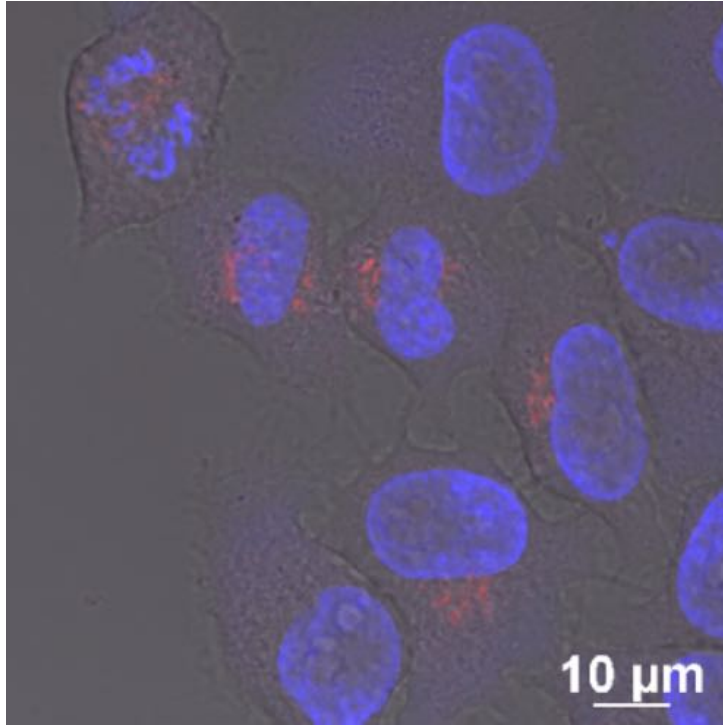

**Supplementary Fig. 9.** Observation of the nucleus and Golgi apparatus in HeLa cells.

To visualize the nucleus and Golgi apparatus in HeLa mCAT cells, the nucleus was stained with Hoechst 33342 (blue region), and red fluorescent protein for binding to N-acetylgalactosaminyltransferase in the Golgi apparatus was expressed. To show the shape of the cell, a fluorescence image was overlaid on the bright-field image.



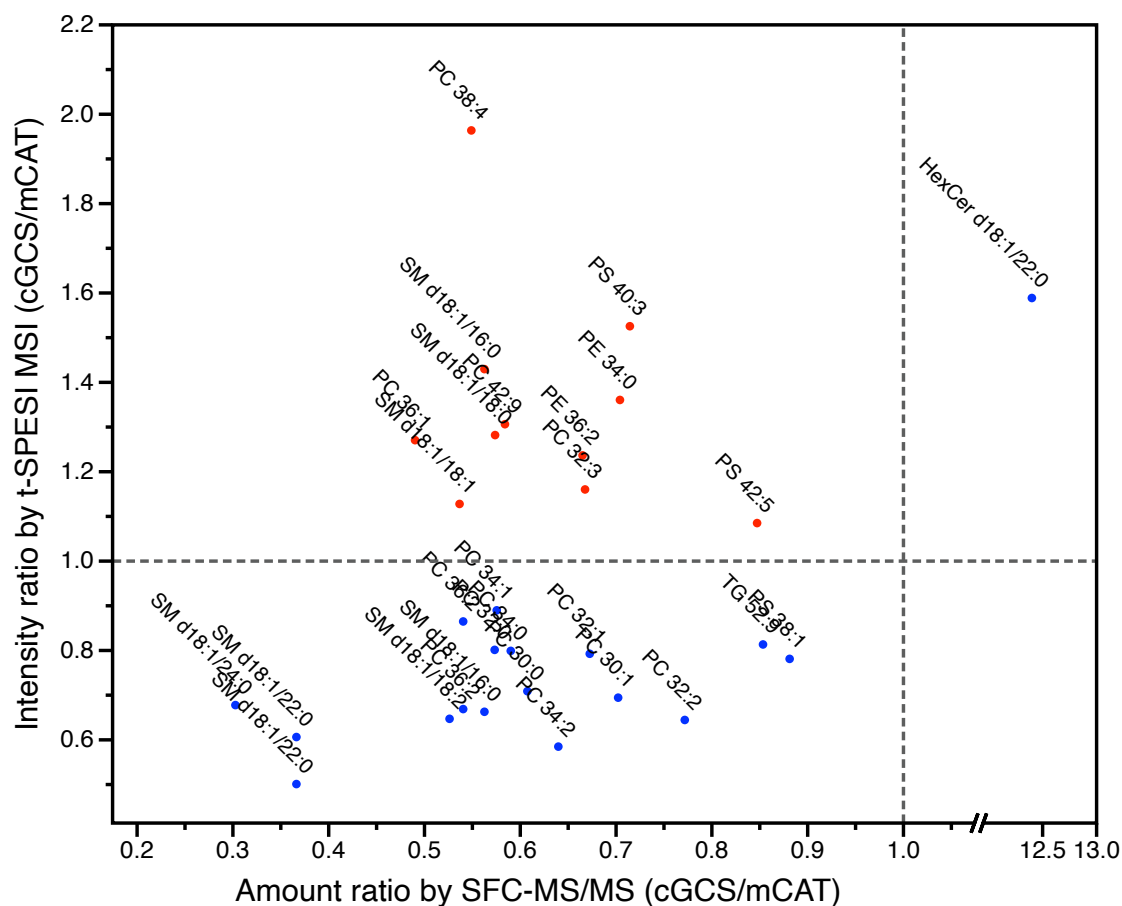

**Supplementary Fig. 10.** Comparison of lipid ion signal intensity ratios acquired via t-SPESI MSI and lipid amount ratios measured via SFC-MS/MS.

The horizontal axis shows the ratio of the amounts of lipids in cGCS and mCAT cells obtained via SFC-MS/MS. The vertical axis shows the ratio of the signal intensities of lipid ions in cGCS and mCAT cells obtained via t-SPESI MSI. The numerical values for each ratio are listed in Supplementary Table 5. Each data point is labeled with a lipid species. The blue dots indicate that the ratios determined via SFC-MS/MS and t-SPESI MSI are positively correlated, and the red dots indicate that they are negatively correlated.

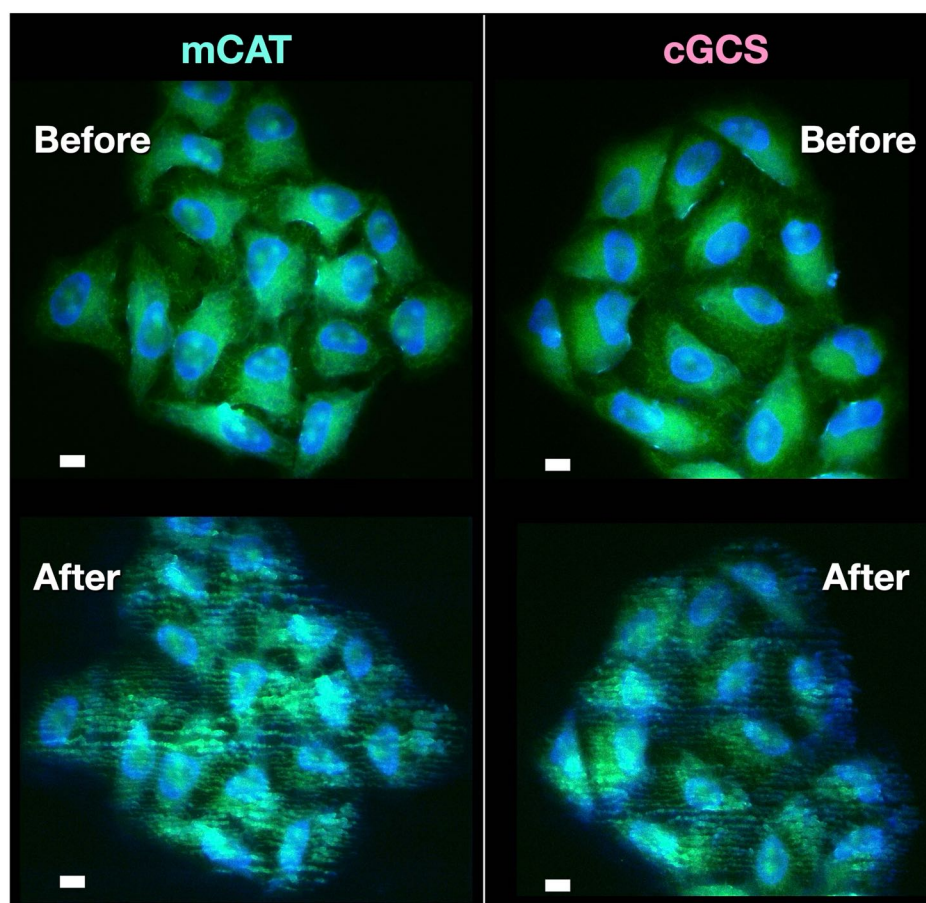

**Supplementary Fig. 11.** Comparison of fluorescence microscope images of HeLa cells before and after single-cell imaging. Scale bar: 10  $\mu\text{m}$ .

**Supplementary Table 1.** Analysis results for spreading area of liquid bridge. The types of images correspond to those shown in Fig. 3.

| Image name | Area ( $\mu\text{m}^2$ ) | Diameter ( $\mu\text{m}$ ) |
|------------|--------------------------|----------------------------|
| a          | 6.5                      | 2.9                        |
| b          | 8.4                      | 3.3                        |
| c          | 7.8                      | 3.2                        |
| d          | 7.8                      | 3.2                        |
| e          | 8.4                      | 3.3                        |
| f          | 10.1                     | 3.6                        |
| g          | 22.0                     | 5.3                        |
| h          | 20.6                     | 5.1                        |
| i          | 18.1                     | 4.8                        |
| j          | 20.6                     | 5.1                        |
| k          | 14.9                     | 4.4                        |
| l          | 16.1                     | 4.5                        |

**Supplementary Table 2.** Parameters of P-2000 for the fabrication of capillary probes.

|        | HEAT | FIL | VEL | DEL | PUL |
|--------|------|-----|-----|-----|-----|
| LINE 1 | 235  | 0   | 15  | 225 | 0   |
| LINE 2 | 235  | 0   | 15  | 225 | 0   |
| LINE 3 | 235  | 0   | 15  | 225 | 0   |
| LINE 4 | 235  | 0   | 15  | 225 | 0   |
| LINE 5 | 235  | 0   | 10  | 225 | 0   |
| LINE 6 | 235  | 0   | 10  | 225 | 0   |
| LINE 7 | 235  | 0   | 10  | 225 | 0   |

**Supplementary Table 3.** List of NaI cluster ions in positive ion mode mass spectra.

| $m/z$    | Ion                                 |
|----------|-------------------------------------|
| 172.884  | (NaI)Na <sup>+</sup>                |
| 322.778  | (NaI) <sub>2</sub> Na <sup>+</sup>  |
| 472.673  | (NaI) <sub>3</sub> Na <sup>+</sup>  |
| 622.567  | (NaI) <sub>4</sub> Na <sup>+</sup>  |
| 772.461  | (NaI) <sub>5</sub> Na <sup>+</sup>  |
| 922.355  | (NaI) <sub>6</sub> Na <sup>+</sup>  |
| 1072.250 | (NaI) <sub>7</sub> Na <sup>+</sup>  |
| 1222.144 | (NaI) <sub>8</sub> Na <sup>+</sup>  |
| 1372.038 | (NaI) <sub>9</sub> Na <sup>+</sup>  |
| 1521.932 | (NaI) <sub>10</sub> Na <sup>+</sup> |
| 1671.827 | (NaI) <sub>11</sub> Na <sup>+</sup> |
| 1821.721 | (NaI) <sub>12</sub> Na <sup>+</sup> |
| 1971.615 | (NaI) <sub>13</sub> Na <sup>+</sup> |

**Supplementary Table 4.** List of equipments used in the t-SPESI measurement system.

| Unit name         | Name                                  | Model          | Manufacturer         | Country |
|-------------------|---------------------------------------|----------------|----------------------|---------|
| Control unit      | PXI controller                        | cRIO-9047      | NI                   | USA     |
|                   | A/D converter                         | NI9215         | NI                   | USA     |
|                   | D/A converter                         | NI9263         | NI                   | USA     |
|                   | Relay                                 | NI9482         | NI                   | USA     |
|                   | Power supply for PXI controller       | PS-16          | NI                   | USA     |
|                   | Lock-in amplifier                     | LI5650         | NF                   | Japan   |
|                   | High voltage source for ESI           | 610C           | Trek                 | USA     |
|                   | PC (microscope)                       | Precision 3660 | DELL                 | USA     |
|                   | PC (t-SPESI)                          | Precision 3640 | DELL                 | USA     |
| t-SPESI unit      | Laser unit                            | TC-20-DCGS-RP  | NEO ARK              | Japan   |
|                   | Piezo actuator                        | PMF-3020       | NTK Ceratek          | Japan   |
|                   | Laser controller                      | DPS-5004       | NEO ARK              | Japan   |
|                   | Probe XYZ stage controller            | HIT-S/HIT-M    | OptoSigma            | Japan   |
|                   | Probe X stage                         | SGSP26-50      | OptoSigma            | Japan   |
|                   | Probe Y stage                         | SGSP20-35      | OptoSigma            | Japan   |
|                   | Probe Z stage                         | OSMS20-85      | OptoSigma            | Japan   |
|                   | Probe Z piezo stage controller        | NCS-7102C      | THK Precision        | Japan   |
|                   | Probe Z piezo stage                   | B22-083        | THK Precision        | Japan   |
|                   | Probe vibration piezo amplifier       | M-26109-OU     | MESS-TEK             | Japan   |
| Microscope unit   | Optical microscope                    | TE2000-U       | Nikon                | Japan   |
|                   | Microscope stage                      | BIOS-206T      | OptoSigma            | Japan   |
|                   | Microscope stage controller           | FC-101G        | OptoSigma            | Japan   |
|                   | Light source for fluorescence imaging | C-HGFIE        | Nikon                | Japan   |
|                   | Camera                                | DS-Fi3         | Nikon                | Japan   |
|                   | Capture software                      | NIS-Elements   | Nikon                | Japan   |
|                   | USB camera                            | IC1500CU       | Shodensha            | Japan   |
|                   | USB camera                            | IC1300CU       | Shodensha            | Japan   |
|                   | Macro zoom lens                       | MLH-10X        | Computar             | Japan   |
| Ion transfer tube | Temperature controller                | MTCS           | Misumi               | Japan   |
| Others            | Background reduction                  | ABIRD          | ESI Source Solutions | USA     |
|                   | Isolation table                       | HAX-0806       | JVI                  | Japan   |
|                   | Oscilloscope                          | DSOX2004A      | KEYSIGHT             | USA     |

**Supplementary Table 5.** Optimized MRM parameters for lipidomic analysis via SFC/MS/MS.

| Polarity                      | Positive        | Negative        |
|-------------------------------|-----------------|-----------------|
| Sheath gas flow rate          | 10 arb          | 50 arb          |
| Aux gas flow rate             | 0 arb           | 10 arb          |
| Spray voltage                 | 3.5 kV          | -2.0 kV         |
| Ion transfer tube temperature | 320 °C          | 320 °C          |
| S-lens level                  | 60              | 60              |
| Vaporizer temperature         | 100 °C          | 100 °C          |
|                               |                 |                 |
| Polarity                      | Positive        | Negative        |
| Full MS                       |                 |                 |
| Resolution                    | 60000           | 60000           |
| AGC target                    | $1 \times 10^6$ | $1 \times 10^6$ |
| Maximum IT                    | 200 ms          | 200 ms          |
| Scan range                    | 200-2000        | 200-2000        |

Supplementary Table 6. List of lipids.

| Lipid name        | Formula        | Exact mass  | Adduct               | Measured <i>m/z</i> | SFC-MS/MS results |                         |                          |                  |                     | 1-SPESI results    |             |                     |                               |                                |                                   |                |                       |
|-------------------|----------------|-------------|----------------------|---------------------|-------------------|-------------------------|--------------------------|------------------|---------------------|--------------------|-------------|---------------------|-------------------------------|--------------------------------|-----------------------------------|----------------|-----------------------|
|                   |                |             |                      |                     | RT (min)          | GCS amount (amole/cell) | mCAT amount (amole/cell) | Ratio (GCS/mCAT) | Measured <i>m/z</i> | Matched <i>m/z</i> | Delta (ppm) | Ion                 | GCS averaged signal intensity | mCAT averaged signal intensity | Signal intensity ratio (GCS/mCAT) | t-test p-value | Leyens's test p-value |
| PC 30:1           | C38H74N10BP1   | 703.515205  | [M+H] <sup>+</sup>   | 704.523005          | 7.540.01          | 134.448                 | 191.477                  | 0.702            | 704.527             | 704.523            | 5.8         | [M+H] <sup>+</sup>  | 604.2                         | 870.0                          | 0.69                              | 7.7E-18        | 5.9E-04               |
| PC 30:0           | C38H76N10BP1   | 705.530655  | [M+H] <sup>+</sup>   | 706.538655          | 7.4440.02         | 446.050                 | 734.354                  | 0.607            | 706.541             | 706.538            | 3.4         | [M+H] <sup>+</sup>  | 2902.3                        | 4094.3                         | 0.71                              | 5.4E-17        | 2.3E-01               |
| SM d18:1/16:0     | C39H79N20BP1   | 702.5675749 | [M+H] <sup>+</sup>   | 703.5753749         | 8.0540.02         | 807.615                 | 1435.566                 | 0.563            | 725.557             | 725.557            | 0.8         | [M+Na] <sup>+</sup> | 643.8                         | 971.3                          | 0.66                              | 4.9E-10        | 9.4E-04               |
| SM d18:1/18:1     | C41H81N20BP1   | 728.583225  | [M+H] <sup>+</sup>   | 729.591025          | 8.1140.02         | 39.604                  | 73.805                   | 0.537            | 729.587             | 729.591            | 4.3         | [M+H] <sup>+</sup>  | 351.4                         | 311.5                          | 1.13                              | 9.1E-07        | 6.7E-02               |
| PC 32:2           | C40H78N10BP1   | 729.530655  | [M+H] <sup>+</sup>   | 730.538655          | 7.5340.02         | 366.988                 | 475.550                  | 0.772            | 730.537             | 730.538            | 1.7         | [M+H] <sup>+</sup>  | 1089.6                        | 1690.6                         | 0.64                              | 1.6E-05        | 1.6E-05               |
| PC 32:1           | C40H78N10BP1   | 731.5465051 | [M+H] <sup>+</sup>   | 732.5543051         | 7.4740.01         | 1179.388                | 2645.875                 | 0.673            | 732.554             | 732.554            | 0.2         | [M+H] <sup>+</sup>  | 8249.8                        | 10408.1                        | 0.79                              | 3.5E-10        | 6.0E-02               |
| PC 32:0           | C40H80N10BP1   | 733.5621552 | [M+H] <sup>+</sup>   | 734.5699552         | 7.4240.02         | 560.219                 | 1012.155                 | 0.573            | 734.570             | 734.569            | 0.7         | [M+H] <sup>+</sup>  | 9691.3                        | 12093.8                        | 0.80                              | 4.9E-07        | 4.9E-01               |
| SM d18:1/16:0     | C41H79N20BP1   | 702.5675749 | [M+H] <sup>+</sup>   | 703.5753749         | 8.0540.02         | 807.615                 | 1435.566                 | 0.563            | 741.532             | 741.531            | 1.9         | [M+K] <sup>+</sup>  | 2063.1                        | 1443.1                         | 1.43                              | 9.7E-09        | 1.5E-03               |
| PE 36:2           | C41H78N10BP1   | 743.5465051 | [M+H] <sup>+</sup>   | 744.5543051         | 9.1740.02         | 18077.309               | 27183.895                | 0.665            | 744.558             | 744.554            | 5.5         | [M+H] <sup>+</sup>  | 1287.9                        | 1041.6                         | 1.24                              | 7.0E-06        | 1.2E-04               |
| SM d18:1/18:2     | C41H79N20BP1   | 726.5675749 | [M+H] <sup>+</sup>   | 727.5753749         | 8.1440.02         | 0.881                   | 1.674                    | 0.526            | 749.560             | 748.557            | 4.0         | [M+Na] <sup>+</sup> | 912.4                         | 1410.0                         | 0.65                              | 1.2E-08        | 1.4E-05               |
| PE 34:0           | C39H78N10BP1   | 719.5465051 | [M+H] <sup>+</sup>   | 720.5543051         | 9.1240.02         | 560.148                 | 795.620                  | 0.704            | 758.505             | 758.510            | 6.4         | [M+K] <sup>+</sup>  | 1599.2                        | 1175.4                         | 1.36                              | 1.7E-08        | 3.3E-02               |
| PC 34:2           | C42H80N10BP1   | 757.5621552 | [M+H] <sup>+</sup>   | 758.5699552         | 7.5140.01         | 1335.567                | 2087.701                 | 0.640            | 758.569             | 758.569            | 1.2         | [M+H] <sup>+</sup>  | 4242.8                        | 7254.5                         | 0.58                              | 7.9E-24        | 2.1E-02               |
| PC 34:1           | C42H82N10BP1   | 759.5778052 | [M+H] <sup>+</sup>   | 760.5856052         | 7.4440.01         | 1993.658                | 3464.749                 | 0.575            | 760.585             | 760.585            | 0.2         | [M+H] <sup>+</sup>  | 19057.5                       | 21417.0                        | 0.89                              | 4.8E-04        | 6.1E-01               |
| PC 32:3           | C40H74N10BP1   | 727.515205  | [M+H] <sup>+</sup>   | 728.523005          | 7.5440.01         | 9.312                   | 13.949                   | 0.668            | 766.479             | 766.478            | 0.6         | [M+K] <sup>+</sup>  | 464.7                         | 400.5                          | 1.16                              | 1.4E-08        | 1.4E-01               |
| SM d18:1/18:0     | C41H83N20BP1   | 730.588675  | [M+H] <sup>+</sup>   | 731.606675          | 8.0340.02         | 113.219                 | 197.347                  | 0.574            | 769.559             | 769.562            | 3.5         | [M+K] <sup>+</sup>  | 1542.9                        | 1203.5                         | 1.28                              | 1.9E-06        | 6.6E-05               |
| PC 34:0           | C42H84N10BP1   | 761.5934553 | [M+H] <sup>+</sup>   | 762.6012553         | 7.4140.03         | 136.404                 | 231.174                  | 0.590            | 784.578             | 784.583            | 5.9         | [M+Na] <sup>+</sup> | 3083.2                        | 3858.3                         | 0.80                              | 9.5E-09        | 2.6E-01               |
| HexCer d18:1/22:0 | C46H89N10B     | 783.6586188 | [M+H] <sup>+</sup>   | 784.6666188         | 7.6340.01         | 33.231                  | 2.680                    | 12.400           | 784.667             | 784.666            | 1.7         | [M+H] <sup>+</sup>  | 473.1                         | 297.8                          | 1.59                              | 1.7E-12        | 2.8E-13               |
| PC 36:2           | C44H84N10BP1   | 785.5934553 | [M+H] <sup>+</sup>   | 786.6012553         | 7.4840.01         | 1160.222                | 2147.009                 | 0.540            | 786.600             | 786.601            | 0.5         | [M+H] <sup>+</sup>  | 5879.7                        | 6798.1                         | 0.86                              | 2.0E-03        | 1.4E-01               |
| SM d18:1/22:0     | C45H91N20BP1   | 786.6614753 | [M+H] <sup>+</sup>   | 787.6692753         | 7.9740.02         | 106.753                 | 291.424                  | 0.366            | 787.669             | 787.669            | 0.4         | [M+H] <sup>+</sup>  | 779.4                         | 1555.4                         | 0.50                              | 3.6E-25        | 4.5E-01               |
| PC 36:1           | C44H86N10BP1   | 787.6091053 | [M+H] <sup>+</sup>   | 788.6168053         | 7.4140.02         | 132.987                 | 271.316                  | 0.480            | 788.613             | 788.616            | 3.8         | [M+H] <sup>+</sup>  | 3722.5                        | 2929.7                         | 1.27                              | 2.6E-08        | 8.5E-01               |
| PC 36:2           | C44H84N10BP1   | 785.5934553 | [M+H] <sup>+</sup>   | 786.6012553         | 7.4840.01         | 1160.222                | 2147.009                 | 0.540            | 808.580             | 808.583            | 3.5         | [M+Na] <sup>+</sup> | 3396.6                        | 5078.1                         | 0.67                              | 3.0E-17        | 2.3E-02               |
| SM d18:1/22:0     | C45H91N20BP1   | 786.6614753 | [M+H] <sup>+</sup>   | 787.6692753         | 7.9740.02         | 106.753                 | 291.424                  | 0.366            | 809.647             | 809.651            | 4.1         | [M+Na] <sup>+</sup> | 513.3                         | 846.6                          | 0.61                              | 2.8E-17        | 7.0E-05               |
| PS 36:1           | C44H84N10BP1   | 817.5832445 | [M-H] <sup>-</sup>   | 816.575445          | 17.4640.04        | 48.338                  | 54.857                   | 0.881            | 837.680             | 837.591            | 1.1         | [M+H] <sup>+</sup>  | 1485.2                        | 1901.2                         | 0.78                              | 3.1E-05        | 9.8E-10               |
| SM d18:1/24:0     | C47H95N20BP1   | 814.6927754 | [M+H] <sup>+</sup>   | 815.7005754         | 7.9540.02         | 66.894                  | 221.045                  | 0.303            | 837.680             | 837.682            | 2.9         | [M+Na] <sup>+</sup> | 370.8                         | 547.1                          | 0.68                              | 5.7E-16        | 1.9E-07               |
| PC 38:4           | C46H84N10BP1   | 809.5934553 | [M+H] <sup>+</sup>   | 810.6012553         | 7.5340.03         | 116.267                 | 211.815                  | 0.549            | 848.556             | 848.557            | 0.8         | [M+K] <sup>+</sup>  | 3182.7                        | 1620.7                         | 1.96                              | 2.0E-15        | 2.4E-06               |
| PS 40:3           | C46H84N10BP1   | 841.5832845 | [M-H] <sup>-</sup>   | 840.5754845         | 17.5840.03        | 22.918                  | 32.080                   | 0.714            | 880.546             | 880.546            | 2.8         | [M+K] <sup>+</sup>  | 1152.2                        | 755.2                          | 1.53                              | 2.5E-14        | 3.5E-03               |
| TG 62:9           | C55H86O6       | 844.6590905 | [M+NH4] <sup>+</sup> | 862.6924966         | 4.1440.02         | 0.250                   | 0.293                    | 0.853            | 883.524             | 883.521            | 3.3         | [M+K] <sup>+</sup>  | 484.2                         | 595.2                          | 0.81                              | 2.1E-13        | 3.1E-07               |
| PC 42:5           | C50H84N10BP1   | 855.5778052 | [M+H] <sup>+</sup>   | 856.5856052         | 7.7540.02         | 2.349                   | 4.022                    | 0.584            | 894.537             | 894.541            | 4.7         | [M+K] <sup>+</sup>  | 893.6                         | 684.0                          | 1.31                              | 2.1E-13        | 2.4E-01               |
| PS 42:5           | C48H84N1010BP1 | 865.5832845 | [M-H] <sup>-</sup>   | 864.5754845         | 17.40.02          | 387.555                 | 469.256                  | 0.847            | 904.547             | 904.546            | 0.2         | [M+K] <sup>+</sup>  | 712.5                         | 656.7                          | 1.09                              | 2.9E-03        | 9.2E-02               |
